# Supplementary material for: Origin of Quartz Diorite and Mafic Enclaves in the Delong Gold-Copper Deposit and Evaluation of the Gold-Copper Mineralization Potential
Source: MDPI journal article supplement (doi:10.3390/min13091202), 2023-09-13
Supplement: s1 [file s1]

## Supplementary Figures

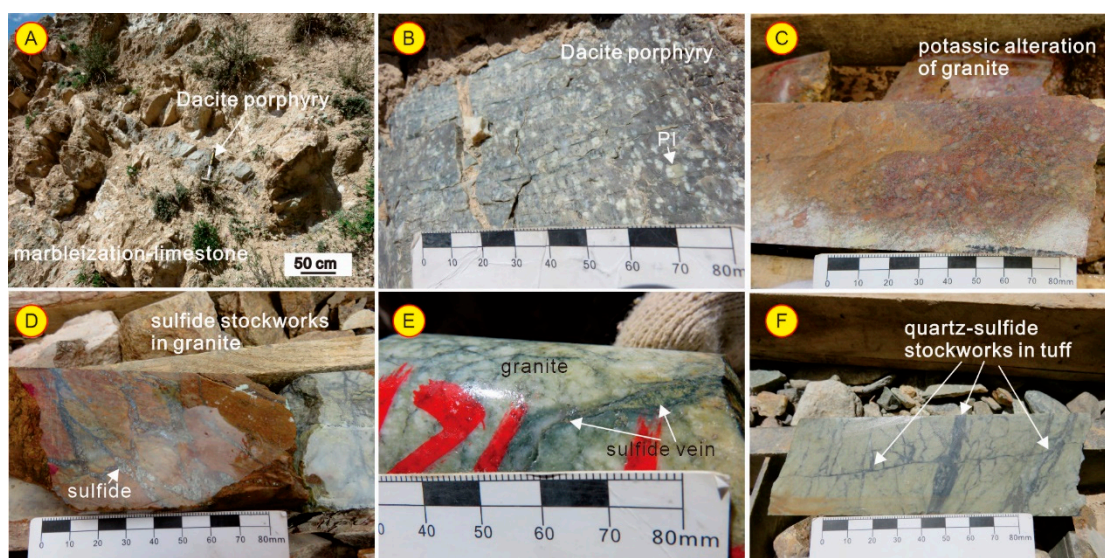

**Figure S1** (A) Outcrop of the dacite porphyry vein; (B) Outcrop of the dacite porphyry; (C) Potassic granite from drill hole; (D) Sulfide stockworks in potassic granite; (E) Sulfide-vein in granite; (F) Quartz-sulfide stockworks in tuff.

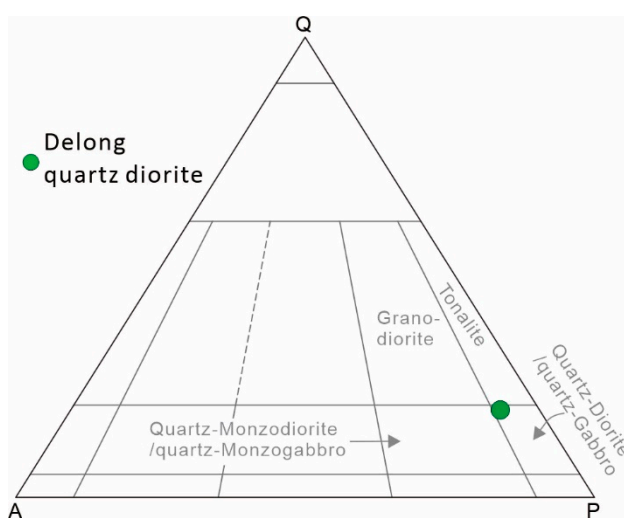

**Figure S2** QAP diagram for the Delong quartz diorite (after International Union of Geological Sciences). Q-Quartz; A-Alkali-Felspar; P-Plagioclase.

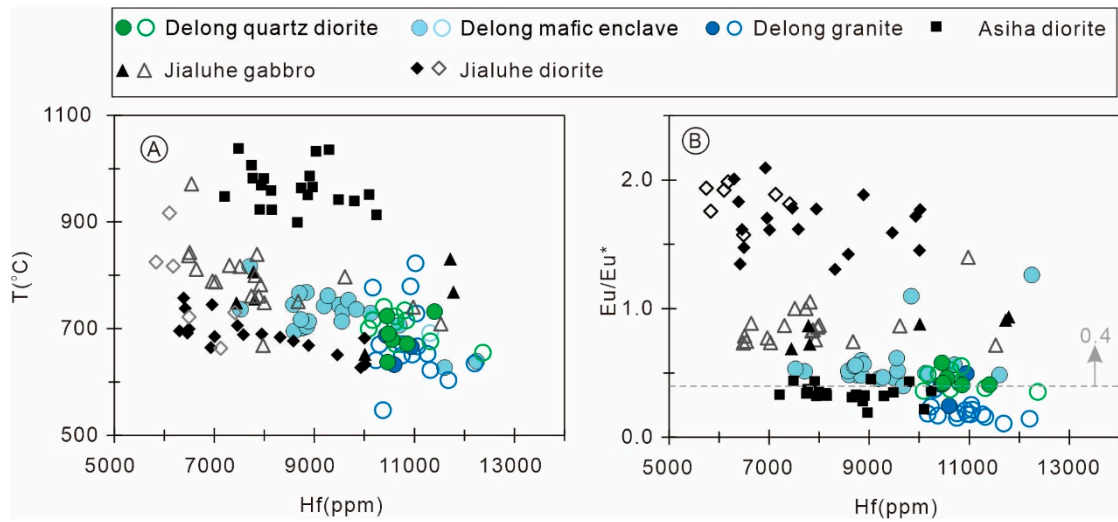

**Figure S3** (A)  $T(^{\circ}\text{C})$  vs. Hf (ppm) and (B)  $\text{Eu}/\text{Eu}^*$  vs. Hf (ppm) diagrams for zircons.

Filled labels represent data points with  $\text{La} < 0.1$  ppm and  $\text{Y}/\text{Ho} < 34$  and the unfilled represent the opposite. Data sources, and method for calculating temperature and  $\text{Eu}/\text{Eu}^*$  are the same as in Fig.7
