# Supplementary material for: Origin of Quartz Diorite and Mafic Enclaves in the Delong Gold-Copper Deposit and Evaluation of the Gold-Copper Mineralization Potential
Source: MDPI journal article supplement (doi:10.3390/min13091202), 2023-09-13
Supplement: s1 [file s1]

Archive with 2 entries (2 files):
- minerals-2517817-Figures S1-S3.pdf
- minerals-2517817-Supplementary Material(Table S1-S8).xlsx
