# Supplementary material for: Origin of Quartz Diorite and Mafic Enclaves in the Delong Gold-Copper Deposit and Evaluation of the Gold-Copper Mineralization Potential
Source: MDPI journal article supplement (doi:10.3390/min13091202), 2023-09-13
Supplement: s1 [file s1 › minerals-2517817-Supplementary Material(Table S1-S8).xlsx]

## Sheet: Table S1 Zircon age
Table S1. LA-ICP-MS Zircon U-Pb data of the Delong quartz diorite and mafic enclave
Spot number	232Th	238U	Th/U	Isotopic ratios									Age(Ma)
	ppm	ppm		207Pb/206Pb	±σ	207Pb/235U	±σ	206Pb/238U	±σ	208Pb/232Th	±σ		207Pb/206Pb	±σ	207Pb/235U	±σ	206Pb/238U	±σ	208Pb/232Th	±σ
quartz diorite
DB042-2-01	403.357	610.052	0.661185	0.0547784	0.00160416	0.279504	0.00856134	0.03676	0.000459523	0.0102544	0.000188634		466.71	66.66	250.264	6.7962	232.719	2.86	206.21	3.774
DB042-2-02	176.482	271.53	0.649953	0.0542742	0.00229139	0.276633	0.0106663	0.0372114	0.000543478	0.0108519	0.000300949		383.385	96.2875	247.983	8.48525	235.525	3.38019	218.16	6.01756
DB042-2-03	301.034	380.137	0.791908	0.0545056	0.00162176	0.27488	0.00790491	0.0365735	0.000454749	0.0106603	0.000189468		390.79	66.66	246.588	6.29813	231.559	2.83083	214.328	3.78918
DB042-2-04	160.775	237.406	0.677218	0.0536468	0.00237427	0.275619	0.0119976	0.0371759	0.000504851	0.0116315	0.000295665		366.72	99.99	247.176	9.55151	235.304	3.1404	233.742	5.90735
DB042-2-05	147.705	230.952	0.639548	0.0533017	0.00229684	0.269606	0.0109707	0.0369946	0.000614763	0.0115405	0.000318461		342.65	96.285	242.379	8.77548	234.177	3.82373	231.923	6.36337
DB042-2-06	418.688	382.095	1.09577	0.0527442	0.00197604	0.26736	0.00959843	0.0367384	0.000569492	0.0110431	0.000226358		316.725	117.58	240.581	7.69181	232.584	3.54331	221.983	4.52522
DB042-2-07	186.81	249.579	0.748503	0.0508886	0.00176001	0.254496	0.00858348	0.036474	0.000527103	0.0108113	0.000244344		235.25	84.245	230.222	6.94919	230.94	3.28072	217.348	4.88592
DB042-2-08	171.628	265.66	0.646042	0.0518802	0.00185028	0.260602	0.00917326	0.0365123	0.000507876	0.0113764	0.000251133		279.69	84.245	235.152	7.39056	231.178	3.16111	228.645	5.01885
DB042-2-09	120.775	202.195	0.597316	0.0641642	0.0034158	0.32162	0.0138078	0.0372446	0.000608005	0.0129359	0.00039021		746.3	112.95	283.148	10.6101	235.731	3.78086	259.786	7.7863
DB042-2-10	118.534	196.165	0.604255	0.0570164	0.00299704	0.285819	0.0134535	0.0372792	0.00100378	0.011472	0.000329941		500.04	116.65	255.263	10.6254	235.946	6.23954	230.554	6.59321
DB042-2-11	141.732	230.64	0.614519	0.0530147	0.00243127	0.272682	0.0126214	0.0372862	0.000594992	0.0115899	0.000336831		327.835	105.545	244.836	10.0711	235.99	3.69989	232.91	6.73011
DB042-2-12	136.256	252.94	0.538687	0.0480227	0.00221744	0.247177	0.0118431	0.0371737	0.000566903	0.0109004	0.000343571		101.94	103.69	224.28	9.64324	235.29	3.5258	219.129	6.86945
DB042-2-13	94.9973	163.168	0.582206	0.0518651	0.00296229	0.261743	0.0142536	0.0371264	0.000808343	0.0108819	0.000288555		279.69	131.463	236.071	11.4716	234.996	5.02598	218.76	5.76956
DB042-2-14	230.638	472.325	0.488303	0.0523115	0.00175485	0.268873	0.00970814	0.0370084	0.000501831	0.0112405	0.00025664		298.21	75.9175	241.792	7.77043	234.263	3.12213	225.929	5.1296
DB042-2-15	176.781	247.296	0.714856	0.0511831	0.00247628	0.258772	0.0121171	0.0369289	0.000531992	0.0106416	0.000272005		250.065	83.3225	233.677	9.77547	233.769	3.30971	213.955	5.43994
DB042-2-16	167.535	294.263	0.569337	0.0555641	0.00210435	0.280601	0.0101438	0.0368834	0.000595705	0.0114793	0.000305796		435.23	83.325	251.134	8.04475	233.485	3.70571	230.7	6.11067
mafic enclave
DB041-1-01	230.438	212.741	1.08319	0.0560657	0.00258203	0.283485	0.0127023	0.0364108	0.000481311	0.0118109	0.000285602		453.75	101.843	253.418	10.0505	230.547	2.99631	237.325	5.70527
DB041-1-02	156.72	226.314	0.692492	0.0536613	0.00264589	0.269795	0.0133608	0.0365789	0.000467844	0.0116876	0.000293852		366.72	111.1	242.53	10.6851	231.593	2.91218	234.862	5.87079
DB041-1-03	383.211	296.652	1.29178	0.0538189	0.00226034	0.275174	0.0120905	0.0368787	0.000410813	0.0116849	0.000213046		364.87	94.435	246.822	9.62875	233.457	2.55719	234.808	4.2564
DB041-1-04	277.897	225.813	1.23065	0.0496172	0.00241664	0.255809	0.0128124	0.036535	0.000444832	0.0112897	0.000238363		176.01	112.948	231.284	10.3607	231.319	2.76932	226.912	4.76407
DB041-1-05	82.8463	129.737	0.63857	0.0551739	0.00290135	0.285373	0.0141917	0.0369883	0.000461882	0.0119918	0.000318332		420.42	116.655	254.911	11.2121	234.138	2.87406	240.939	6.35797
DB041-1-06	358.875	291.917	1.22937	0.0480534	0.00201944	0.244419	0.00970688	0.0372896	0.000484427	0.0115713	0.000227373		101.94	96.29	222.032	7.92176	236.011	3.01325	232.54	4.54314
DB041-1-07	188.428	184.061	1.02373	0.056089	0.00325988	0.285347	0.0156877	0.0371834	0.000475132	0.0119185	0.000287979		457.45	134.243	254.89	12.394	235.351	2.95583	239.475	5.75213
DB041-1-08	561.53	424.691	1.32221	0.0496088	0.00167226	0.253261	0.00831252	0.0364917	0.000458261	0.0114282	0.00025113		176.01	79.6175	229.221	6.73655	231.05	2.85286	229.68	5.01855
DB041-1-09	230.517	206.808	1.11464	0.0483613	0.00232561	0.245394	0.0118503	0.0368275	0.000465587	0.011295	0.000222272		116.755	116.645	222.828	9.66286	233.138	2.8975	227.017	4.44243
DB041-1-10	171.006	197.429	0.866162	0.0544513	0.0024561	0.275545	0.0119831	0.0369149	0.000467503	0.0116516	0.000268164		390.79	101.843	247.117	9.54047	233.682	2.90917	234.143	5.35777
DB041-1-11	60.5314	117.877	0.513513	0.0505083	0.00472545	0.254884	0.0198801	0.0365635	0.000776758	0.0108074	0.000540215		216.74	203.68	230.536	16.0867	231.496	4.83229	217.269	10.8022
DB041-1-12	504.5	421.818	1.19601	0.0502444	0.00161073	0.257297	0.0084148	0.0370795	0.000380147	0.011359	0.000209073		205.63	74.06	232.487	6.79756	234.705	2.36637	228.297	4.17838
DB041-1-13	56.5255	133.9	0.422148	0.0531081	0.00253167	0.26677	0.0121808	0.0367889	0.000464451	0.0124023	0.000430683		344.5	109.248	240.108	9.7649	232.898	2.89054	249.137	8.59842
DB041-1-14	647.161	494.908	1.30764	0.051237	0.00144288	0.259261	0.00742416	0.0366071	0.000356958	0.0115785	0.000198421		250.065	67.58	234.071	5.98846	231.768	2.22336	232.683	3.96463
DB041-1-15	62.7003	145.443	0.431099	0.0495924	0.00263346	0.248381	0.0118954	0.0365361	0.000522629	0.0118909	0.000353714		176.01	119.427	225.26	9.67646	231.326	3.25273	238.924	7.06534
DB041-1-16	387.373	328.202	1.18029	0.0503006	0.00181639	0.259084	0.00930921	0.0373209	0.000386936	0.0111386	0.000215147		209.33	87.95	233.929	7.50906	236.205	2.40799	223.891	4.3007
DB041-1-17	855.73	596.93	1.43355	0.0518613	0.00159402	0.267295	0.00799911	0.0372269	0.000369919	0.0114709	0.000208372		279.69	70.36	240.529	6.41114	235.621	2.30258	230.533	4.1639
DB041-1-18	220.794	210.57	1.04855	0.0531133	0.00245789	0.270124	0.0124648	0.0368767	0.000558085	0.0120145	0.000320934		344.5	100.915	242.793	9.9662	233.444	3.47199	241.392	6.40978
DB041-1-19	382.845	334.163	1.14568	0.0499318	0.00176758	0.25537	0.00870994	0.0370934	0.00040715	0.0113578	0.000234284		190.82	83.32	230.929	7.04663	234.791	2.53396	228.273	4.68222
DB041-1-20	140.583	180.896	0.777149	0.0521373	0.0025575	0.261975	0.0122628	0.0366504	0.000504501	0.0115129	0.000262317		300.06	111.095	236.258	9.86792	232.037	3.13974	231.372	5.24166
DB041-1-21	457.176	330.374	1.38382	0.0544908	0.00201096	0.279799	0.0104271	0.0370189	0.000344002	0.0112578	0.000248316		390.79	83.325	250.498	8.27451	234.328	2.14216	226.274	4.96314
DB041-1-22	277.737	312.239	0.889502	0.05267	0.00209705	0.271228	0.0109281	0.0372384	0.000451267	0.0113223	0.000243545		322.28	123.135	243.675	8.73033	235.692	2.8075	227.563	4.86748

## Sheet: Table S2 major and TE
Table S2. Major (%) and trace elements (ppm) data of the Delong quartz diorite and mafic enclaves
	Quartz diorite							mafic enclaves
sample	D1027-2	DB038-1	DB040-1	DB042-2	DB070-1	DB070-2		DB070-3	DB036-1	DB039-1	DB041-1	DB042-1
SiO2	63.09	62.41	61.91	61.1	61.99	62.88		54.74	53.85	51.77	53.48	54.54
Al2O3	15.88	16.34	16.08	16.08	16.4	16.04		11.68	16.11	16.06	15.3	15.5
Fe2O3T	6.02	6.58	6.39	7.16	6.14	6.3		8.56	9.87	12.08	11.28	9.37
MgO	2.34	2.15	2.18	2.79	2.11	1.95		9.34	4.49	4.3	5.28	5.18
CaO	5.48	5.54	5.62	5.88	5.84	5.33		9.36	7.9	7.67	8.75	8.1
Na2O	3.33	3.44	3.39	3.18	3.56	3.31		1.9	3.2	3.06	2.95	3.22
K2O	1.78	1.2	1.46	1.73	1.06	1.4		0.75	1.72	1.3	0.83	0.63
TiO2	0.65	0.72	0.68	0.8	0.69	0.66		0.55	0.68	1.44	0.75	0.75
P2O5	0.13	0.15	0.15	0.16	0.15	0.14		0.06	0.08	0.28	0.11	0.13
MnO	0.11	0.12	0.12	0.12	0.12	0.1		0.17	0.23	0.23	0.26	0.22
Total	99.86	99.97	100.27	100.22	99.76	99.92		99.74	99.43	100.18	100.03	99.34
LOI	0.84	1.09	2.09	0.99	1.5	1.58		2.4	1.12	1.57	0.8	1.49
Na2O+K2O	5.11	4.64	4.85	4.91	4.62	4.71		2.65	4.92	4.36	3.78	3.85
A/CNK	0.9131	0.958234	0.924256	0.902415	0.929488	0.962043		0.556503	0.7486	0.786669	0.70535	0.747542
Mg#	43.7383	39.5221	40.5581	43.7991	40.7336	38.2353		68.5756	47.6393	41.5861	48.3516	52.5089
Li	6.63	5.66	5.46	5.3	4.2	7.43		8.28	3.75	11.1	3.75	3.92
Be	1.81	1.87	2.15	1.45	1.33	1.52		1.8	1.41	2.33	1.53	2.07
Sc	18.3	18.8	21.1	18.2	16.9	15.8		35.7	29.8	37.5	36.2	25.1
V	119	130	117	135	109	112		252	202	307	211	173
Cr	24.2	17.2	15.2	17.3	13.8	12.5		361	123	34.4	178	144
Co	68.4	62.2	62.2	63.9	67.7	60		62.6	43	49.2	52	48.6
Ni	33.7	22	24.6	26.1	24.6	25.2		36.5	46.5	14.3	31.6	36.6
Cu	5.01	3.17	7.96	6.61	2.76	2.11		2.75	10	90.1	15.9	16.8
Zn	68.58	74.61	62.19	74.88	63.54	59.49		76.05	99	117	110.7	99.9
Ga	19.6	20.3	18.7	18.2	19.5	19.2		13.2	19.4	21.7	19.8	18.5
Rb	58.6	36.2	34.9	47.7	22.7	34		23.9	63.2	39.3	20.9	12.2
Sr	272	288	314	282	304	314		199	275	270	273	274		400
Zr	139	206	207	158	208	168		72.8	101	133	101	122
Nb	10.8	10.7	9.81	11.2	10.2	8.85		5.61	10.8	17.5	10.1	10
Cs	1.48	0.685	0.42	0.47	0.301	0.448		0.321	0.476	0.422	0.248	0.225
Ba	533	561	652	606	476	656		374	349	407	213	230
La	106	32.6	24.6	42.1	45.7	27.3		19.6	17.8	36	18.4	22.6
Ce	166	60.8	50.5	77.3	79.6	48.4		36.7	49.1	91.3	57.1	59.6
Pr	15.4	6.65	6	8.91	8.15	5.06		4.06	7.33	12.1	8.83	8.15
Nd	47.2	24.9	22.6	31.3	28.6	19.3		14.6	30.3	49.1	38.5	33.7
Sm	6.29	4.41	4.81	5.92	5.28	3.72		2.84	6.89	10.6	9.05	7.21
Eu	1.25467	1.23858	1.23866	1.37738	1.33878	1.16914		0.789753	1.80054	2.00419	2.03543	1.88152
Gd	5.7867	4.84173	5.09976	5.9195	5.71774	4.12451		3.41483	6.84067	9.88992	9.07525	7.5624
Tb	0.855	0.694	0.824	0.985	0.818	0.625		0.485	1.08	1.64	1.46	1.23
Dy	4.94	4.62	4.88	6.03	5.1	3.8		3.13	6.9	10.1	9.22	7.4
Ho	0.979	0.932	1.12	1.18	1.04	0.757		0.664	1.46	2.01	1.88	1.49
Er	2.89	2.9	3.24	3.49	3.16	2.4		1.93	4.38	6.39	6.26	4.69
Tm	0.435	0.411	0.471	0.527	0.467	0.38		0.28	0.692	0.98	0.898	0.743
Yb	2.8	2.52	3.17	3.24	2.88	2.19		1.93	4.28	5.93	5.6	4.82		<1.9
Lu	0.425	0.432	0.521	0.493	0.445	0.363		0.271	0.705	0.855	0.841	0.745
Y	28.6	29.2	30.7	32.7	29.5	23.2		19.2	46.3	63.7	61.6	43.1		<15
Hf	3.66	4.56	4.67	3.97	4.9	3.79		2.11	2.4	2.98	2.56	3.28
Ta	1.33	0.922	1.26	1.2	1.6	1.06		0.666	0.887	1.04	0.747	0.949
Pb	13.5	11.1	15.3	15	12.8	11.1		6.56	9.96	9.28	10.1	14.8
Th	31	7.1	6.73	13.4	13.2	7.84		6.41	1.65	2.09	1.02	3.68
U	1.68	0.923	1.34	0.992	1	0.919		0.571	0.765	0.668	0.58	0.582
REE	361.255	147.949	129.074	188.772	188.297	119.589		90.6946	139.558	238.899	169.15	161.822
Eu/Eu*	0.624577	0.815317	0.759275	0.703661	0.74061	0.908323		0.774117	0.792737	0.588634	0.679372	0.773078
Sr/Y	9.51049	9.86301	10.228	8.62385	10.3051	13.5345		10.3646	5.93952	4.23862	4.43182	6.35731
Dy/Yb	1.76429	1.83333	1.53943	1.86111	1.77083	1.73516		1.62176	1.61215	1.7032	1.64643	1.53527
La/Sm	0.0184191	0.0110069	0.0253503	0.0234397	0.00907895	0.00671975		0.0138191	0.0363636	0.333704	0.0582418	0.0613139
Nb/Ta	8.1203	11.6052	7.78571	9.33333	6.375	8.34906		8.42342	12.1759	16.8269	13.5207	10.5374
La/Yb	37.8571	12.9365	7.76025	12.9938	15.8681	12.4658		10.1554	4.15888	6.07083	3.28571	4.6888
(La/Yb)N	27.1549	9.27935	5.56643	9.32047	11.3821	8.94168		7.28449	2.98316	4.3546	2.35684	3.36327
TZr (oC)	744.598	672.423	782.615	696.003	778.034	661.755		749.518	688.152	758.846	794.754	735.615
LOI = loss of ignition, Mg# =Molar MgO/(FeOt+MgO) . REE = Total rare earth element. Eu/Eu*=EuN/(SmN×GdN)0.5. The REE contents of chondrite used to calculate Eu/Eu* and (La/Yb)N are from Sun and McDonough (1989). TZr=12,900/(2.95+0.85M+lnDZr, zircon/melt) (Watson and Harrison, 1983), where DZr, zircon/melt is the ratio of Zr concentrations (ppm) in zircon to that in the saturated melt, M=cation ra…
References
Sun, S.S., McDonough, W.F., 1989. Chemical and isotopic systematics of oceanic basalts: implications for mantle composition and processes. Geological Society, London, Special Publications 42 (1), 313-345.
Watson, E.B., Harrison, T.M., 1983. Zircon saturation revisited: temperature and composition effects in a variety of crustal magma types. Earth and Planetary Science Letters 64, 295–304.

## Sheet: Table S3 Zircon TE
Table S3. Trace elements (ppm) data of zircons extracted from the Delong quartz diorite and mafic enclaves
	La	Ce	Pr	Nd	Sm	Eu	Gd	Tb	Dy	Ho	Er	Tm	Yb	Lu	Y	Ti	Nb	Ta	δEu	δYb	Nb/Ta	Dy/Yb	TZircon-Ti (oC)	±	zircon Ce(IV)/Ce(III)	Log(fO2)	△NNO	△FMQ
Quartz diorite
DB042-2-01	0.705618	14.8558	0.240098	1.69355	1.97756	0.395307	11.7774	4.98214	70.4808	30.3195	155.172	39.8237	426.848	84.3141	969.783	2.09076	2.85461	1.96618	0.194077	1.29994	1.45185	0.165119	655.491	9.98065	132.226	-14.3578	1.46462	0.721789
DB042-2-02	0.0493419	11.4452	0.0510605	0.829202	1.62217	0.416221	12.0214	4.69931	65.3101	28.7013	148.511	38.2985	416.846	83.5309	899.281	2.57336	1.95292	1.09207	0.207703	1.30057	1.78827	0.156677	671.983	10.2185	209.924	-11.6374	2.16496	0.791379
DB042-2-03	0.0645463	16.294	0.0471246	1.16322	2.43613	0.598314	15.8308	5.86961	82.0154	34.618	177.152	47.0902	511.48	95.707	1113.92	1.65415	3.44591	1.69332	0.221944	1.34451	2.035	0.160349	637.566	9.72408	185.143	-14.1955	2.28024	1.49625
DB042-2-04	0.535731	12.4386	0.10691	1.19693	1.56067	0.380304	9.718	3.78872	51.3237	21.7506	112.621	29.0104	321.247	61.3126	683.757	5.3254	1.46601	0.950985	0.228108	1.34419	1.54157	0.159764	734.661	11.1373	145.21	-9.60451	2.35201	0.421107
DB042-2-05	0.0189315	10.8001	0.0322433	0.486476	1.69171	0.523684	8.94254	3.5083	49.3613	20.8062	109.156	28.6644	325.213	63.2769	659.639	4.72521	1.63119	0.941488	0.330898	1.34755	1.73256	0.151781	723.791	10.9763	279.414	-7.70282	4.3414	0.303589
DB042-2-06	15.7777	46.6666	3.48801	18.2366	9.13661	2.05493	35.5825	11.5491	149.178	56.6138	271.266	65.1659	695.706	123.857	1730.18	4.33132	1.82359	0.868333	0.304292	1.36656	2.10011	0.214426	716.024	10.8617	21.2991	-17.6977	3.2308	2.48311
DB042-2-07	0.0779446	11.1023	0.0541686	0.654431	1.17206	0.298057	8.44946	3.17147	42.7131	17.5901	89.628	23.9174	260.83	49.9954	562.419	5.18319	1.29645	0.766624	0.21071	1.33109	1.69112	0.163758	732.179	11.1005	230.89	-7.99025	2.19035	0.203858
DB042-2-08	0	11.1824	0.0353477	0.612658	1.3585	0.417321	11.1155	4.14381	57.5719	24.9373	129.333	34.0314	373.326	71.7572	782.099	2.81783	1.80114	1.09616	0.228531	1.33318	1.64313	0.154213	679.375	10.3256	274.433	-10.2035	2.8792	0.691229
DB042-2-09	42.4415	83.5593	8.36983	33.0724	6.53786	1.0025	11.768	3.81092	50.2382	21.1395	108.276	29.2953	345.717	68.0907	667.826	5.70867	1.61638	1.0259	0.345701	1.366	1.57557	0.145316	741.088	11.2328	23.5198	-16.0784	3.24801	3.80737
DB042-2-10	0.215596	9.76596	0.067732	0.867164	1.39708	0.412576	8.32693	3.29693	45.8643	20.2268	105.047	28.8799	334.006	64.9929	639.785	2.54725	1.60806	0.915187	0.286532	1.36049	1.75708	0.137316	671.159	10.2066	173.458	-12.4064	3.60392	0.806982
DB042-2-11	10.5094	30.2531	2.01945	8.82271	2.63248	0.479301	11.7471	4.04587	56.178	24.4608	125.602	33.8398	386.225	71.5251	773.314	4.70438	1.98218	1.12803	0.222238	1.38538	1.75719	0.145454	723.393	10.9704	48.3437	-14.3147	1.71193	2.09707
DB042-2-12	0.00636049	9.331	0.0430794	0.382151	1.40684	0.364497	9.87892	4.04918	55.9294	24.2516	125.041	33.61	379.508	71.0925	761.943	3.23832	1.78658	1.07834	0.219476	1.37008	1.65678	0.147373	690.932	10.4938	351.466	-8.612	2.35855	0.2988
DB042-2-13	9.33663	23.8302	1.95451	7.16437	2.24932	0.575548	8.91283	3.65193	44.2335	19.6322	97.8677	25.9919	291.942	55.8406	594.333	4.32199	1.35228	0.697326	0.341751	1.35231	1.93923	0.151515	715.834	10.8589	43.9473	-15.0665	4.01044	2.05676
DB042-2-14	2.40075	16.1858	0.671576	3.55313	2.21151	0.448282	11.4937	4.76323	67.8525	29.1263	153.465	41.2407	467.11	85.0748	926.039	2.72838	3.07622	1.88012	0.219621	1.39164	1.63619	0.14526	676.734	10.2873	72.7177	-15.3434	1.8667	0.861723
DB042-2-15	17.7582	44.5209	3.74327	15.0927	3.77323	0.778683	13.0289	4.32918	57.8455	23.9826	117.67	31.2624	343.481	62.5896	735.793	4.12937	1.70585	0.963444	0.30491	1.37029	1.77057	0.16841	711.815	10.7997	32.0267	-16.4575	3.0754	2.82055
DB042-2-16	53.7586	112.49	12.0773	51.8083	10.3904	1.2228	20.5962	6.06393	77.8992	33.0049	165.332	43.5533	484.929	90.0799	1008.23	3.62168	2.47285	1.31757	0.250782	1.36624	1.87683	0.16064	700.433	10.6326	17.5509	-19.2755	1.56218	4.39288
Mafic enclave
DB041-1-01	0.00769126	11.2825	0.190765	2.89131	5.33526	1.38412	27.1456	9.67165	119.683	47.3866	215.449	46.2889	439.417	93.432	1397.28	12.1866	0.925686	0.531217	0.285856	1.17913	1.74258	0.272367	816.949	12.3783	46.5747	-9.9484	3.50715	-0.371756
DB041-1-02	0.00680804	10.3242	0.0287484	0.557913	1.17106	0.373138	7.4224	2.92749	41.3549	18.6351	99.0587	24.4972	268.838	66.5141	612.881	3.90039	1.18513	0.84748	0.293946	1.1753	1.39842	0.153828	706.833	10.7265	451.641	-6.81656	4.14952	0.409491
DB041-1-03	0.00993053	19.7903	0.224375	4.28139	8.27236	2.05192	47.1282	16.4319	198.079	77.1221	346.843	71.5005	665.029	139.093	2215.55	5.91937	1.60124	0.668146	0.249666	1.17681	2.39653	0.297851	744.473	11.2832	52.1251	-12.9357	2.89349	0.942207
DB041-1-04	0.0340161	13.7323	0.129554	2.12789	4.35395	1.24943	26.6266	9.27425	111.463	44.109	200.425	42.8821	402.136	87.2227	1295.76	5.189	1.05357	0.474087	0.272637	1.16036	2.22231	0.277177	732.282	11.102	79.3316	-11.9968	3.56403	0.658892
DB041-1-05	0.00604003	5.40327	0.0303986	0.329681	1.05396	0.353422	6.24766	2.47454	33.0269	14.3021	75.9826	18.1592	193.265	46.775	461.848	4.22859	0.484272	0.327579	0.326809	1.17023	1.47834	0.17089	713.904	10.8304	327.724	-7.6359	4.78688	-0.301829
DB041-1-06	0.064962	19.1444	0.247358	4.52359	7.87041	1.98166	42.7176	14.4371	182.565	69.0994	313.355	64.9678	595.015	125.716	2012.62	3.65259	1.18251	0.584952	0.263516	1.16187	2.02155	0.306825	701.163	10.6433	47.1637	-15.5825	3.12372	1.3177
DB041-1-07	0.0178505	11.5413	0.142148	2.57446	4.94949	1.23176	25.999	8.98013	113.278	44.5494	211.413	44.5008	425.807	92.8507	1342.75	3.4214	0.921594	0.469031	0.267363	1.16898	1.96489	0.266032	695.579	10.5616	55.3487	-15.2947	3.15191	0.896148
DB041-1-08	0.052533	27.4093	0.415633	5.84103	10.8655	2.69894	64.4697	22.611	271.876	105.781	473.086	97.5314	882.296	183.168	3079.41	5.80213	2.22552	0.826092	0.241898	1.1649	2.69404	0.308147	742.602	11.2554	52.8816	-12.9772	2.78517	1.21358
DB041-1-09	0.00480029	13.583	0.146573	3.4642	5.78125	1.78559	30.6142	10.5247	124.984	48.474	221.492	47.1436	442.83	94.6641	1449.4	7.59041	0.8437	0.458496	0.329685	1.16978	1.84015	0.282239	768.316	11.6402	44.3595	-12.3628	4.58386	0.386036
DB041-1-10	0.0257802	10.8354	0.070912	1.90143	3.40719	0.934541	20.5938	7.49951	93.1849	37.9285	180.076	39.7385	384.852	85.0088	1137.77	5.02571	1.01681	0.511613	0.263103	1.1685	1.98746	0.242132	729.366	11.0588	82.8595	-11.9823	3.31668	0.391871
DB041-1-11	0.332762	5.22193	0.0731664	0.519186	0.508285	0.205496	2.68614	1.33289	16.4221	7.88332	46.6765	12.5203	141.019	35.6566	278.859	3.28571	0.541314	0.402825	0.432252	1.17781	1.34379	0.116453	692.155	10.5116	318.799	-8.94008	7.33851	-0.0588503
DB041-1-12	0.0338568	22.1672	0.336358	4.78836	8.5009	2.21087	49.544	17.1032	209.748	81.6127	377.894	81.1842	767.306	163.325	2441.75	3.78985	1.86999	0.826795	0.256991	1.17592	2.26173	0.273357	704.341	10.6899	57.1029	-14.6984	3.10458	1.22065
DB041-1-13	0.00292722	4.83967	0.0151702	0.25597	0.596344	0.146081	3.01893	1.06519	15.5915	7.3456	39.3815	10.401	119.737	30.9652	246.447	1.44258	0.487764	0.470549	0.270992	1.17741	1.03659	0.130214	627.411	9.57961	450.528	-11.5145	3.16784	0.413125
DB041-1-14	0.0455613	25.8175	0.392456	6.70625	10.133	2.88204	61.836	20.5	250.821	98.002	448.193	94.1805	880.002	187.53	2924.54	5.94831	2.00984	0.842842	0.270693	1.16853	2.3846	0.285023	744.93	11.2901	46.4959	-13.3364	3.51393	0.955255
DB041-1-15	0	4.96105	0.0234889	0.119997	0.186254	0.18061	2.18632	0.856071	13.5307	6.50958	37.8652	10.4213	125.148	32.9324	227.042	1.68721	0.443253	0.426573	0.525281	1.19213	1.0391	0.108118	639.054	9.74529	1906.15	-5.33351		0.24836
DB041-1-16	0.0375387	16.5234	0.280563	4.31363	7.17497	2.14083	39.2729	12.7674	154.134	60.4184	281.766	61.545	595.374	128.166	1852.75	4.2235	1.05259	0.552397	0.31017	1.18299	1.90548	0.258886	713.798	10.8289	45.5741	-15.0234	4.2041	0.834263
DB041-1-17	0.0800998	33.4811	0.468177	6.91291	13.5383	3.97362	76.6189	26.011	318.322	122.496	565.347	118.147	1096.61	231.843	3680.26	7.46093	2.53316	1.13435	0.297015	1.16928	2.23313	0.290277	766.631	11.6149	55.2488	-11.6304	3.97123	1.04715
DB041-1-18	0.0181189	12.002	0.126375	2.36141	4.64634	1.27318	24.5556	8.91427	111.535	43.7227	203.589	44.4171	425.815	93.4558	1302.16	5.41129	0.899233	0.512668	0.292957	1.16631	1.75403	0.261933	736.133	11.1592	65.1175	-12.5318	3.73864	0.449303
DB041-1-19	0.033573	20.1076	0.321956	4.84411	8.32418	2.16964	51.8968	16.9572	207.885	80.2983	360.617	74.5903	676.918	139.727	2370.07	7.09777	1.59345	0.710249	0.243741	1.17011	2.2435	0.307105	761.772	11.5419	46.5164	-12.5018	2.91935	0.708834
DB041-1-20	0.019426	7.92981	0.0694783	0.975504	2.08757	0.614566	11.5105	4.18447	56.3005	23.6675	118.317	27.5246	284.63	65.564	748.875	4.39069	0.733377	0.385099	0.304236	1.18239	1.90438	0.197802	717.231	10.8795	138.719	-10.6913	4.08274	0.04302
DB041-1-21	0.0083499	18.3473	0.0659028	0.974249	2.92599	0.64783	18.0174	6.43475	83.5431	33.9042	161.277	34.4971	328.49	70.4178	1026.76	6.49385	2.00451	0.814289	0.209167	1.17615	2.46167	0.254325	753.226	11.4139	257.553	-6.53404	2.0639	0.636868
DB041-1-22	0.0479766	9.65496	0.136003	2.02813	2.51398	1.35855	12.1401	4.58026	56.2775	23.6652	124.557	31.1861	339.246	83.3588	785.994	5.43254	0.960027	0.421036	0.620424	1.17417	2.28015	0.16589	736.494	11.1645	89.0206	-11.3523
The Eu/Eu*=EuN/(SmN×GdN)0.5, δYb=YbN/(TmN×LuN)0.5, rare earth element contents of chondrite used to calculate δEu and δYb are from Sun and McDonough (1989). The TTi are calculated follow the method of Ferry and Watson.(2007) with designated activity of SiO2 (1.0) and TiO2 (0.6). Zircon Ce(IV)/Ce(III) values are calculated based on the lattice strain model (Zou et al., 2019); Log(fO2) and △NNO are…
References
Ferry, J.M., Watson, E.B., 2007. New Thermodynamic Models and Revised Calibrations for the Ti-in-Zircon and Zr-in-Rutile Thermometers. Contrib Mineral Petrol, 154: 429-437. 10.1007/s00410-007-0201-0 Sun, S.S., McDonough, W.F., 1989. Chemical and isotopic systematics of oceanic basalts: implications for mantle composition and processes. Geological Society, London, Special Publications 42 (1), 313-…

## Sheet: Table S4 amphibole EPMA
Table S4 Electron microporbe analysis results of amphibole in Delong quartz diorite and mafic enclaves
Spot	DB038Hbl0101o	DB038Hbl0102i	DB038Hbl0103o	DB038Hbl0201i	DB038Hbl0202o	DB038Hbl0301i	DB038Hbl0302o	DB038Hbl04i	DB038Hbl05i	DB039Hble0101i	DB039Hble0102o	DB039Hble04	DB039Hble05	DB036Hbl01i	DB036Hbl02o	DB041Hble01i	DB041Hble02o	DB041Hbll0101i	DB041Hbll0102o
	Quartz diorite									mafic enclave
SiO2	42.852	45.631	43.624	45.621	42.627	45.092	43.844	44.84	43.281	44.116	43.617	43.157	43.123	45.364	44.769	45.681	45.804	46.084	46.118
TiO2	1.352	0.913	1.405	1.406	1.33	1.632	1.423	1.313	1.172	1.307	1.293	1.383	1.463	1.339	1.339	1.344	1.397	1.229	0.91
Al2O3	8.99	7.837	8.95	7.933	8.499	7.047	9.245	7.212	8.988	8.287	8.708	8.755	9.34	7.162	7.828	8.04	7.963	7.589	7.541
Cr2O3	0.006	0.051	0.026	0.008	3.368	3.154	0.083		0.008	0.024	0.029	0.012	0.002	0.029	0.027	0.153	0.185	0.029	0.099
FeO	19.49	19.022	19.541	18.387	18.663	15.387	19.648	18.303	20.449	20.499	21.289	20.617	20.563	18.107	18.384	18.595	18.266	18.135	19.088
MnO	0.464	0.442	0.463	0.434	0.439	0.262	0.406	0.491	0.436	0.55	0.497	0.417	0.404	0.49	0.457	0.419	0.527	0.361	0.345
MgO	9.011	10.362	9.037	10.176	8.543	11.571	9.237	9.924	8.616	8.665	8.024	8.406	8.28	10.093	9.961	10.253	10.196	10.409	10.041
CaO	11.895	11.286	11.588	11.352	11.519	11.053	11.699	11.919	12.039	11.757	11.774	11.96	11.984	11.906	12.143	11.45	11.487	12.119	11.668
Na2O	1.201	0.815	1.223	1.253	0.857	1.27	1.311	0.85	1.073	1.003	1.148	1.084	1.149	0.996	0.895	1.08	0.937	0.948	0.799
K2O	1.088	0.572	0.918	0.682	0.997	0.606	1.075	0.624	1.021	0.892	0.92	1.035	1.189	0.707	0.853	0.492	0.509	0.606	0.457
F	0.082						0.02		0.199									0.125
Cl	0.118	0.075	0.127	0.125	0.091	0.069	0.132	0.089	0.09	0.063	0.096	0.07	0.095	0.079	0.047	0.076	0.072	0.061	0.051
SUM	96.549	97.006	96.902	97.377	96.933	97.143	98.123	95.565	97.372	97.163	97.395	96.896	97.592	96.272	96.703	97.583	97.343	97.695	97.117
Based on 13 cations
Si	6.58526	6.79313	6.63635	6.82095	6.51775	6.70261	6.59529	6.87049	6.61348	6.71468	6.66598	6.62768	6.58638	6.90239	6.79633	6.78853	6.82016	6.88892	6.89181
AlIV	1.41474	1.20687	1.36365	1.17905	1.48225	1.23454	1.40471	1.12951	1.38652	1.28532	1.33402	1.37232	1.41362	1.09761	1.20367	1.21147	1.17984	1.11108	1.10819
TiIV	0	0	0	0	0	0.0628474	0	0	0	0	0	0	0	0	0	0	0	0	0
AlVI	0.2135	0.168176	0.241006	0.218846	0.0493244	0	0.234318	0.172857	0.23213	0.201241	0.234478	0.212288	0.267659	0.18673	0.196895	0.196694	0.217571	0.225955	0.219962
TiVI	0.156243	0.102212	0.160731	0.158083	0.152928	0.119578	0.160972	0.151289	0.134673	0.149598	0.148603	0.159718	0.168036	0.153211	0.152862	0.150197	0.156426	0.138157	0.102265
Cr	0.000729002	0.00600283	0.00312718	0.000945683	0.407156	0.370665	0.00987137	0	0.000966492	0.00288812	0.00350414	0.00145702	0.000241514	0.00348869	0.00324068	0.0179766	0.021779	0.00342748	0.011697
Fe3+	0.399876	0.884093	0.481712	0.5128	0.497251	0.623224	0.478889	0.366229	0.425201	0.478259	0.423433	0.37784	0.315544	0.288023	0.319061	0.645808	0.595346	0.333049	0.617031
Mg	2.06435	2.29965	2.04945	2.26812	1.9473	2.56404	2.0714	2.26682	1.96267	1.9661	1.82813	1.92446	1.88528	2.28938	2.25428	2.27143	2.26323	2.31963	2.23691
Fe2+	2.10491	1.48413	2.00432	1.78624	1.88919	1.28951	1.99282	1.97908	2.18793	2.131	2.29751	2.27	2.31097	2.01602	2.0149	1.66515	1.67918	1.93407	1.76847
Mn	0.0603957	0.0557337	0.0596582	0.0549612	0.0568543	0.0329862	0.0517292	0.063722	0.0564294	0.0709051	0.0643355	0.0542415	0.0522643	0.0631495	0.0587623	0.05274	0.0664642	0.0457082	0.0436684
Ca(B)	1.9585	1.80015	1.88873	1.81849	1.88706	1.76028	1.88552	1.95668	1.97097	1.91727	1.92793	1.96788	1.96109	1.94094	1.97506	1.82307	1.83255	1.941	1.86817
Na(B)	0.0414974	0.199853	0.11127	0.181512	0.11294	0.239717	0.114484	0.0433212	0.029025	0.0827292	0.0720747	0.0321181	0.0389119	0.0590608	0.0249385	0.176929	0.167451	0.0589994	0.131828
Na(A)	0.316345	0.0353887	0.249455	0.181715	0.141122	0.126295	0.267876	0.209194	0.288867	0.213261	0.268096	0.290647	0.301343	0.234768	0.238493	0.13425	0.103055	0.215762	0.0996752
K	0.213299	0.108634	0.178158	0.130084	0.194476	0.114915	0.206296	0.121973	0.199029	0.173202	0.179372	0.202773	0.231674	0.137235	0.165198	0.0932747	0.0966869	0.115567	0.087124
Mg/(Mg+Fe2+)	0.495136	0.607766	0.505566	0.559427	0.507573	0.665371	0.509666	0.533885	0.472864	0.479876	0.443115	0.45881	0.449277	0.531746	0.528037	0.577006	0.574073	0.54532	0.558476
(Na+K)A	0.529644	0.144023	0.427613	0.311799	0.335599	0.24121	0.474172	0.331168	0.487896	0.386463	0.447468	0.493419	0.533018	0.372004	0.40369	0.227525	0.199742	0.331329	0.186799
(Ca+Na)B	2	2	2	2	2	2	2	2	2	2	2	2	2	2	2	2	2	2	2
T (°C)		790.823	836.262	802.104	836.174	827.686	845.003							795.918	816.456	802.012	798.571	799.489	781.939
σ		22	22	22	22	22	22							22	22	22	22	22	22
P (MPa)		138.752	193.036	143.387	173.778	113.369	202.816							121.785	143.939	145.52	143.288	131.372	129.705
uncertanty (Max error)		34.688	48.259	35.8467	43.4444	12.4706	50.7041							13.3963	15.8333	36.38	35.8219	14.4509	32.4262
continental depth (km)		5.24029	7.29044	5.41533	6.5631	4.28163	7.65982							4.59947	5.4362	5.49589	5.41158	4.96154	4.89859
∆NNO		0.600494	-0.151076	0.235046	-0.221291	0.781221	-0.139214							0.210258	0.150704	0.323151	0.298011	0.296822	0.411715
logfO2		-13.4394	-13.2292	-13.5622	-13.3092	-12.5013	-13.0417							-13.7276	-13.3474	-13.4751	-13.5741	-13.5609	-13.8253
σ		0.4	0.4	0.4	0.4	0.4	0.4							0.4	0.4	0.4	0.4	0.4	0.4
H2Omelt (wt.%)		6.90116	6.57431	6.34636	6.28767	5.32657	6.14239							6.07863	6.16014	6.98679	7.15168	6.65152	7.31734
σ		0.4	0.4	0.4	0.4	0.4	0.4							0.4	0.4	0.4	0.4	0.4	0.4
Note: i-inner zone of the amphibole grain; o-outer zone of the amphibole grain

## Sheet: Table S5 biotite EPMA
Table S5 Electron microporbe analysis results of biotite in Delong quartz diorite and mafic enclaves
Sample	DB038Bt03	DB038Bt04	DB038Bt05	DB039Bte01	DB039Bte02	DB039Bte03
	Quartz diorite			mafic enclave
SiO2	35.472	35.442	35.46	26.9	35.206	33.773
TiO2	3.736	3.159	3.534	0.248	3.917	3.465
Al2O3	14.288	14.575	14.326	16.584	14.15	14.355
Cr2O3	0.016	0.062	0.036	0.217	0.061	0.118
MgO	9.77	9.027	8.959	12.384	8.924	9.102
FeOt	20.72	21.81	22.18	28.818	22.692	24.379
MnO	0.187	0.27	0.227	0.389	0.242	0.254
CaO		0.002	0.012	0.123	0.105	0.095
BaO	0.533	0.089	0.155		0.679	0.477
Na2O	0.073	0.037	0.05	0.057	0.145	0.064
K2O	10.154	9.909	10.091	0.363	8.948	8.031
Sum	94.949	94.382	95.03	86.083	95.069	94.113
Based on O=22
Si	5.53331	5.5423	5.53508	4.07872	5.48065	5.24555
Al(T)	2.46669	2.4577	2.46492	2.96358	2.51935	2.62773
Fe3+	0	0	0	0.957694	0	0.126717
Ti4+	0	0	0	0	0	0
Al(o)	0.160103	0.228486	0.170602	0	0.0767854	0
Fe3+	0.0881053	0.142198	0.126464	0.548302	0.107842	0.264693
Ti4+	0.438255	0.371486	0.414832	0.0282777	0.458553	0.404712
Cr3+	0.00197331	0.00766547	0.00444287	0.026014	0.00750794	0.0144904
Mn2+	0.0247074	0.035762	0.0300121	0.0499583	0.0319092	0.033415
Mg2+	2.27197	2.10438	2.08475	2.79925	2.07102	2.1075
Fe2+	2.70299	2.85222	2.89536	3.6542	2.95423	3.1666
K	2.02067	1.97679	2.00945	0.0702162	1.77705	1.59129
Na	0.0220785	0.0112181	0.0151322	0.0167569	0.0437653	0.019273
Ca	0	0.000335088	0.00200689	0.0199818	0.0175131	0.0158089
Ba	0.0325808	0.00545378	0.00948097	0	0.041421	0.0290319
Mg/(Mg+Fe)	0.456681	0.424561	0.418615	0.43376	0.412122	0.399594
Fe3+/Fe2+	0.0325955	0.0498552	0.0436781	0.412128	0.0365044	0.123606
T（℃）	709.141	680.032	695.833		709.507	688.008
P(kbar)	1.42919	1.60914	1.45562	2.45	1.33629	1.43202

## Sheet: Table S6 Plagioclase EPMA
Table S6 Electron microporbe analysis results of Plagioclase in Delong quartz diorite and mafic enclaves
Sample	DB038pl0101r	DB038pl0102m	DB038pl0103m	DB038pl0104c	DB038pl0105m	DB038pl0106m	DB038pl0107m	DB038pl0108r	DB038pl09c	DB038pl1001c	DB038pl1002m	DB036pl0101c	DB036pl0102m	DB036pl0103m	DB036pl0104r	DB039Ple0101m	DB039Ple0102c	DB041Pl0101c	DB041Ple0102m	DB041Ple0103r
	Quartz diorite											mafic enclave
SiO2	60.514	56.863	55.719	56.268	57.068	56.966	56.6	56.639	57.336	57.051	59.529	56.125	57.41	56.056	58.949	55.847	55.404	55.931	57.33	58.512
TiO2	0	0	0	0	0.008	0	0.002	0	0.014	0.003	0	0.008	0	0	0.01	0	0	0.013	0	0
Al2O3	24.779	26.521	27.12	26.762	26.48	26.353	26.153	26.25	26.148	26.177	24.386	26.948	26.232	26.39	24.61	27.244	27.513	27.549	26.037	25.446
FeO	0.115	0.146	0.09	0.113	0.12	0.071	0.083	0.09	0.126	0.207	0.026	0.092	0.029	0.056	0.022	0.109	0.071	0.113	0.069	0.061
MgO	0.003	0	0.018	0	0	0	0	0	0	0.001	0	0	0.001	0	0	0	0	0	0	0.001
MnO	0	0	0	0.001	0	0.018	0	0.063	0.005	0	0	0	0.022	0.015	0.031	0.003	0	0	0.03	0.01
CaO	7.137	9.152	10.123	9.779	9.356	9.156	9.289	9.215	8.937	9.121	7.112	9.172	8.965	9.476	7.415	10.177	10.625	9.525	8.958	8.235
Na2O	7.394	6.198	5.678	6.042	6.417	6.468	6.27	6.321	6.482	6.388	7.654	5.847	6.69	6.384	7.244	5.775	5.452	5.55	6.627	6.844
K2O	0.162	0.218	0.201	0.208	0.237	0.111	0.185	0.176	0.203	0.223	0.072	0.548	0.051	0.107	0.087	0.193	0.184	0.745	0.141	0.139
BaO	0.051	0	0.009	0.116	0	0.005	0.139	0.042	0.033	0.023	0.009	0	0	0	0.032	0	0	0	0.135	0.023
Cr2O3	0.024	0.021	0	0.029	0.062	0	0.013	0.05	0.002	0.004	0	0.16	0.077	0.279	0.311	0	0.009	0.048	0.479	0.209
Cl	0.041	0	0.006	0	0.003	0.001	0	0	0	0	0	0	0.001	0.002	0	0	0	0	0	0
Total	100.211	99.131	98.971	99.318	99.75	99.201	98.734	98.846	99.311	99.198	98.821	98.938	99.507	98.768	98.711	99.348	99.267	99.534	99.811	99.487
Based on O=8
Si	2.69143	2.57464	2.53317	2.55104	2.5727	2.57841	2.57697	2.57535	2.59102	2.58333	2.68633	2.5537	2.58951	2.55913	2.67192	2.53022	2.51418	2.53169	2.5921	2.6353
Al	1.29886	1.41524	1.45312	1.42997	1.40691	1.40578	1.40335	1.4067	1.39262	1.39697	1.29695	1.44508	1.39448	1.41991	1.31465	1.45472	1.47145	1.46965	1.38744	1.35069
Z	3.99028	3.98988	3.98629	3.981	3.97961	3.9842	3.98032	3.98205	3.98365	3.9803	3.98328	3.99877	3.98399	3.97904	3.98657	3.98494	3.98563	4.00134	3.97954	3.986
Ca	0.340102	0.443987	0.493102	0.475025	0.451912	0.444027	0.453137	0.448934	0.432715	0.442513	0.343866	0.44714	0.433259	0.463513	0.360101	0.49402	0.516597	0.461944	0.433958	0.397389
Na	0.637597	0.5441	0.500491	0.5311	0.560879	0.567606	0.553479	0.557245	0.567928	0.560818	0.669668	0.515806	0.585055	0.565071	0.636598	0.507283	0.479681	0.487069	0.580935	0.597635
K	0.00919163	0.012592	0.0116576	0.0120301	0.01363	0.0064093	0.0107452	0.010209	0.0117028	0.0128817	0.0041449	0.0318086	0.00293462	0.00623167	0.00503057	0.0111549	0.0106518	0.0430194	0.00813281	0.00798641
Ba	0.000888858	0	0.000160339	0.00206086	0	8.86834e-05	0.00247996	0.000748351	0.000584378	0.000408113	0.000159151	0	0	0	0.000568372	0	0	0	0.00239188	0.000405928
Ti	0	0	0	0	0.00027132	0	6.85044e-05	0	0.000475956	0.000102196	0	0.000273841	0	0	0.00034099	0	0	0.000442686	0	0
Fe	0.00427746	0.00552842	0.00342188	0.00428445	0.00452417	0.00268755	0.00316033	0.00342235	0.00476185	0.00783877	0.000981218	0.00350075	0.00109393	0.00213806	0.000833932	0.00412996	0.00269448	0.00427757	0.00260904	0.00229761
Mg	0.000198908	0	0.00121994	0	0	0	0	0	0	6.75025e-05	0	0	6.72409e-05	0	0	0	0	0	0	6.71412e-05
Mn	0	0	0	3.84003e-05	0	0.000690061	0	0.00242627	0.000191378	0	0	0	0.000840488	0.000580015	0.00119011	0.000115122	0	0	0.00114887	0.000381473
An	34.462	44.3685	49.0526	46.6555	44.0279	43.6158	44.5404	44.1695	42.7438	43.5453	33.7893	44.9498	42.4244	44.7918	35.9479	48.7941	51.3042	46.5654	42.4191	39.6196
Or	0.931373	1.25835	1.15967	1.18156	1.32792	0.629571	1.05619	1.00444	1.15601	1.26762	0.40729	3.19763	0.287356	0.602201	0.502188	1.10177	1.05785	4.33649	0.794975	0.796244
Ab	64.6067	54.3731	49.7877	52.163	54.6441	55.7547	54.4034	54.826	56.1002	55.1871	65.8035	51.8526	57.2882	54.606	63.5499	50.1041	47.638	49.0981	56.7859	59.5841
Note: c-core of the plagioclase grain; m-mantle of the plagioclase grain；r-rim of the plagioclase grain

## Sheet: Table S7 Sr-Nd
Table S7. Sr-Nd isotopic compositions of Delong quartz diorite and mafic enclaves
Sample no.	87Rb/86Sr	87Sr/86Sr	±2σ	(87Sr/86Sr)i	147Sm/144Nd	143Nd/144Nd	±2σ	εNd(t)	TDM (Nd) (Ma)	T2DM (Nd) (Ma)	fSm/Nd
Quartz diorite
D1027-2	0.623749	0.71466	6e-06	0.712584	0.0805562	0.512162	3e-06	-5.82024	1130.53	1479.88	-0.590462
DB038-1	0.363898	0.714242	5e-06	0.713031	0.107062	0.512208	5e-06	-5.72253	1345.44	1471.96	-0.455711
DB040-1	0.32178	0.714253	7e-06	0.713182	0.128656	0.512206	4e-06	-6.39577	1687.73	1526.54	-0.345926
DB042-2	0.489709	0.714382	8e-06	0.712752	0.114334	0.512221	1.1e-05	-5.67933	1423.09	1468.46	-0.418742
mafic enclave
DB036-1	0.665415	0.7153	5e-06	0.713085	0.137459	0.512231	3e-06	-6.17974	1832.76	1509.03	-0.301173
DB039-1	0.421408	0.714496	6e-06	0.713093	0.130503	0.512216	3e-06	-6.24876	1706.15	1514.62	-0.336539
DB041-1	0.221617	0.713201	5e-06	0.712463	0.142098	0.512246	4e-06	-6.01996	1918.49	1496.07	-0.277593
DB042-1	0.128892	0.713133	8e-06	0.712704	0.12933	0.512209	3e-06	-6.36439	1696.4	1523.99	-0.3425
(87Sr/86Sr)i and εNd(t) values are calculated at t = 234 Ma based on present-day (147Sm/144Nd)CHUR = 0.1967 and (143Nd/144Nd)CHUR = 0.512638. T2DM values are calculated based on present-day (147Sm/144Nd)DM = 0.2137 and (143Nd/144Nd)DM = 0.51315. λRb = 1.42×10-11 year-1 (Steiger and Jäger, 1977), λSm = 6.54×10-12 year-1 (Lugmair and Marti, 1978).
References
Steiger, R.H., Jäger, E., 1977. Subcommission on geochronology: convention on the use of decay constants in geo- and cosmochronology. Earth and Planetary Science Letters. 36: 359-362.
Lugmair, G.W., Marti, K., 1978. Lunar initial 143 Nd/ 144 Nd: differential evolution of the lunar crust and mantle. Earth and Planetary Science Letters. 39: 349-357.

## Sheet: Table S8 Hf
Table S8. Hf isotopic data for zircons of the Delong quartz diorite and mafic enclaves
spot	176Yb/177Hf	1σ	176Lu/177Hf	1σ	176Hf/177Hf	1σ	Age (Ma)	εHf(0)	1σ	εHf(t)	1σ	TDM(Hf)(Ma)	1σ	T2DM(Hf) (Ma)	1σ	fLu/Hf
Quartz diorite
DB042-2-1	0.0301317	0.000515453	0.00116592	1.89548e-05	0.282578	2.78419e-05	232.719	-7.32232	1.00356	-2.32934	1.00413	958.155	39.344	1240.54	42.2226	-0.9653
DB042-2-2	0.0294065	0.0001654	0.00120878	8.08206e-06	0.282644	2.40036e-05	235.525	-4.9897	0.870804	0.0581868	0.871318	865.855	34.0155	1110.22	36.4828	-0.964024
DB042-2-3	0.0319924	0.000554672	0.00123842	2.27579e-05	0.282611	3.24208e-05	231.559	-6.14874	1.16284	-1.19122	1.16349	913.003	45.9424	1176.45	49.2593	-0.963142
DB042-2-4	0.0250304	0.000451976	0.000974341	1.36723e-05	0.282594	2.50073e-05	235.304	-6.7423	0.905428	-1.66355	0.905959	930.228	35.1746	1205.63	37.8377	-0.971002
DB042-2-5	0.0363243	0.000372465	0.00143365	1.96639e-05	0.282664	2.51514e-05	243.242	-4.26466	0.910416	0.913278	0.910971	841.844	35.8772	1068.97	38.3752	-0.957332
DB042-2-6	0.0373324	0.000675394	0.00146206	2.25145e-05	0.282651	3.37062e-05	245.078	-4.72715	1.20769	0.485106	1.20839	861.151	48.0989	1094.26	51.4295	-0.956486
DB042-2-7	0.0299697	0.000254629	0.00120321	1.11497e-05	0.28267	2.65445e-05	230.94	-4.0817	0.958602	0.868981	0.959146	829.333	37.6365	1061.44	40.3694	-0.96419
DB042-2-8	0.0254606	0.000220262	0.000986188	7.73945e-06	0.282717	3.48301e-05	231.178	-2.41224	1.24694	2.57763	1.24762	757.965	49.1626	966.501	52.8748	-0.970649
DB042-2-9	0.0256857	0.000371464	0.00102268	1.78422e-05	0.282638	2.78456e-05	245.012	-5.1894	1.0037	0.0924831	1.0043	869.542	39.2625	1115.93	42.2096	-0.969563
DB042-2-10	0.0259824	0.000294115	0.00102297	1.6384e-05	0.282644	2.32856e-05	241.163	-4.98525	0.846072	0.213496	0.846591	861.408	32.8383	1106.1	35.3034	-0.969555
DB042-2-11	0.024193	0.000759024	0.000915346	2.48617e-05	0.282618	2.79294e-05	241.591	-5.89639	1.0066	-0.671682	1.0072	895.173	39.2513	1155.6	42.2568	-0.972758
DB042-2-12	0.0320424	0.000136912	0.00123043	3.81077e-06	0.282669	2.23027e-05	242.795	-4.10703	0.81229	1.09412	0.812793	830.953	31.6439	1058.5	33.9297	-0.96338
DB042-2-13	0.0212855	0.000304508	0.000812591	1.46348e-05	0.282576	2.3585e-05	234.996	-7.37331	0.856372	-2.27639	0.856881	951.246	33.019	1239.35	35.5922	-0.975816
DB042-2-14	0.0298434	0.000360562	0.00111105	8.3633e-06	0.282634	2.56458e-05	230.068	-5.32429	0.927502	-0.378962	0.928029	876.976	36.24	1130.1	38.9158	-0.966933
DB042-2-15	0.0267853	0.000336179	0.00100548	3.37096e-06	0.282609	1.91107e-05	233.769	-6.22106	0.7032	-1.18008	0.703636	910.244	26.912	1177.56	28.937	-0.970075
DB042-2-16	0.0342721	0.000304195	0.00129137	9.33102e-06	0.282618	2.60483e-05	233.485	-5.8929	0.94142	-0.902075	0.941962	904.028	36.969	1161.95	39.6103	-0.961566
Mafic enclave
DB041-1-01	0.0445626	0.00106341	0.00179957	4.22676e-05	0.28247	1.89487e-05	230.547	-11.1366	0.697671	-6.28898	0.698127	1129.37	27.1821	1458.32	28.9789	-0.946441
DB041-1-02	0.0292068	0.00180218	0.00120416	6.81125e-05	0.282464	1.86344e-05	231.593	-11.3509	0.687	-6.39006	0.687503	1120.02	26.3564	1464.61	28.3567	-0.964162
DB041-1-03	0.058096	0.00130425	0.00225867	4.86821e-05	0.282463	1.83814e-05	233.457	-11.3817	0.678423	-6.54385	0.678888	1153.62	26.7052	1474.86	28.3337	-0.932778
DB041-1-04	0.0279845	0.000825578	0.00112183	3.05076e-05	0.282482	1.42764e-05	231.319	-10.7122	0.540945	-5.74428	0.541332	1092.15	20.118	1428.64	21.6218	-0.966612
DB041-1-05	0.0393159	0.000739327	0.00156867	2.83835e-05	0.282456	1.56557e-05	234.138	-11.6202	0.58672	-6.66137	0.587125	1141.84	22.304	1481.73	23.8353	-0.953313
DB041-1-06	0.0508756	0.00104196	0.00199621	3.84931e-05	0.282484	1.78884e-05	236.011	-10.6372	0.661743	-5.70486	0.662192	1115.06	25.8038	1430.42	27.4422	-0.940589
DB041-1-07	0.0490178	0.00112524	0.00201582	4.4464e-05	0.282482	2.06742e-05	235.351	-10.7119	0.756468	-5.79653	0.75696	1118.7	29.8365	1434.97	31.724	-0.940005
DB041-1-08	0.0221099	0.000879241	0.000891186	3.14509e-05	0.282489	1.4403e-05	231.05	-10.484	0.545126	-5.4865	0.545516	1076.48	20.1778	1414.1	21.7492	-0.973477
DB041-1-09	0.0815707	0.00436601	0.00310423	0.000158353	0.282419	2.26621e-05	233.138	-12.9387	0.824594	-8.23873	0.825441	1246.27	34.0506	1568.49	36.2142	-0.907612
DB041-1-10	0.0192178	0.000610269	0.000813677	2.1251e-05	0.282496	1.57194e-05	233.682	-10.2222	0.588855	-5.15551	0.589254	1063.94	21.9682	1397.87	23.6874	-0.975783
DB041-1-11	0.015789	4.89474e-05	0.0007234	2.15935e-06	0.282502	1.45856e-05	231.496	-10.0124	0.551167	-4.9793	0.551538	1053.14	20.3315	1386.34	21.9398	-0.97847
DB041-1-12	0.0840358	0.000697826	0.00331441	2.81595e-05	0.282413	2.08782e-05	234.705	-13.1474	0.763431	-8.44852	0.763905	1262.45	31.1465	1581.38	32.629	-0.901357
DB041-1-13	0.0108914	0.000207123	0.000497425	6.89375e-06	0.282505	1.34815e-05	232.898	-9.9148	0.514816	-4.81623	0.515179	1043.1	18.6849	1378.38	20.2226	-0.985196
DB041-1-14	0.0815972	0.0024242	0.00317596	8.81094e-05	0.282416	2.16673e-05	231.768	-13.0397	0.790449	-8.37854	0.791031	1253.02	32.3343	1575.13	34.0653	-0.905477
DB041-1-15	0.0462785	0.00157768	0.00183986	6.05409e-05	0.282462	1.8192e-05	231.326	-11.4122	0.672008	-6.55446	0.672489	1141.78	26.1567	1473.64	27.9137	-0.945242
DB041-1-16	0.0414063	0.00167452	0.0016649	6.16152e-05	0.282449	1.57812e-05	236.205	-11.8726	0.590908	-6.88508	0.591381	1154.98	22.6004	1495.78	24.1946	-0.950449
DB041-1-17	0.057121	0.00214046	0.00222164	7.68989e-05	0.282462	1.77215e-05	235.621	-11.406	0.656098	-6.51738	0.656626	1153.45	25.7919	1475.11	27.4528	-0.93388
DB041-1-18	0.0427976	0.00129457	0.00180787	5.26383e-05	0.282482	1.71899e-05	233.444	-10.7119	0.638171	-5.8043	0.63863	1112.41	24.6954	1433.82	26.3496	-0.946194
DB041-1-19	0.120129	0.00184532	0.00457189	7.21805e-05	0.282393	2.34992e-05	234.791	-13.8669	0.853386	-9.3622	0.853961	1340.24	36.3977	1632.21	37.7598	-0.863932
DB041-1-20	0.0527328	0.00166581	0.00208822	6.48714e-05	0.282442	1.8125e-05	232.037	-12.123	0.669738	-7.28887	0.670229	1178.52	26.2363	1514.87	27.935	-0.93785
DB041-1-21	0.0728364	0.00174256	0.00277649	6.71515e-05	0.282462	1.80322e-05	234.328	-11.4236	0.666603	-6.64797	0.667104	1171.95	26.6155	1481.44	28.1233	-0.917367
DB041-1-22	0.0666098	0.00199084	0.00264211	7.23586e-05	0.282473	2.23999e-05	235.692	-11.0298	0.815594	-6.20517	0.816159	1151.27	32.9201	1458.01	34.8037	-0.921366
The parameter used in our calculations: (176Lu/177Hf)CHUR = 0.0332, (176Hf/177Hf)CHUR = 0.282772 (Blichert-Toft and Albarède, 1997); (176Lu/177Hf)DM = 0.0384, (176Hf/177Hf)DM = 0.28325 (Griffin et al., 2000); λ(176Lu) = 1.867×10−11 a-1 (Söderlund et al., 2004). The 176Lu/177Hf (C) = 0.015 (Griffin et al., 2000). t=zircon crystallization age.
References
Blichert-Toft, J., Albarède, F., 1997. Separation of Hf and Lu for high-precision isotope analysis of rock samples by magnetic sector-multiple collector ICP-MS. Contributions to Mineralogy and Petrology 127: 248 - 260.
Griffin, W.L., Pearson, N.J., Belousova, E., Jackson, S.E., van Achterbergh, E., O Reilly, S.Y.Ô.S., 2000. The Hf isotope composition of cratonic mantle: LAM-MC-ICPMS analysis of zircon megacrysts in kimberlites. Geochimica et Cosmochimica Acta 64: 133 - 147.
Söderlund, U., Patchett, P.J., Vervoort, J.D., Isachsen, C.E., 2004. The 176Lu decay constant determined by Lu–Hf and U–Pb isotope systematics of Precambrian mafic intrusions. Earth and Planetary Science Letters 219: 311-324.
